# Supplementary material for: Deciphering the Tumor–Immune–Microbe Interactions in HPV-Negative Head and Neck Cancer
Source: MDPI journal article supplement (doi:10.3390/genes14081599), 2023-08-08
Supplement: s1 [file s1]

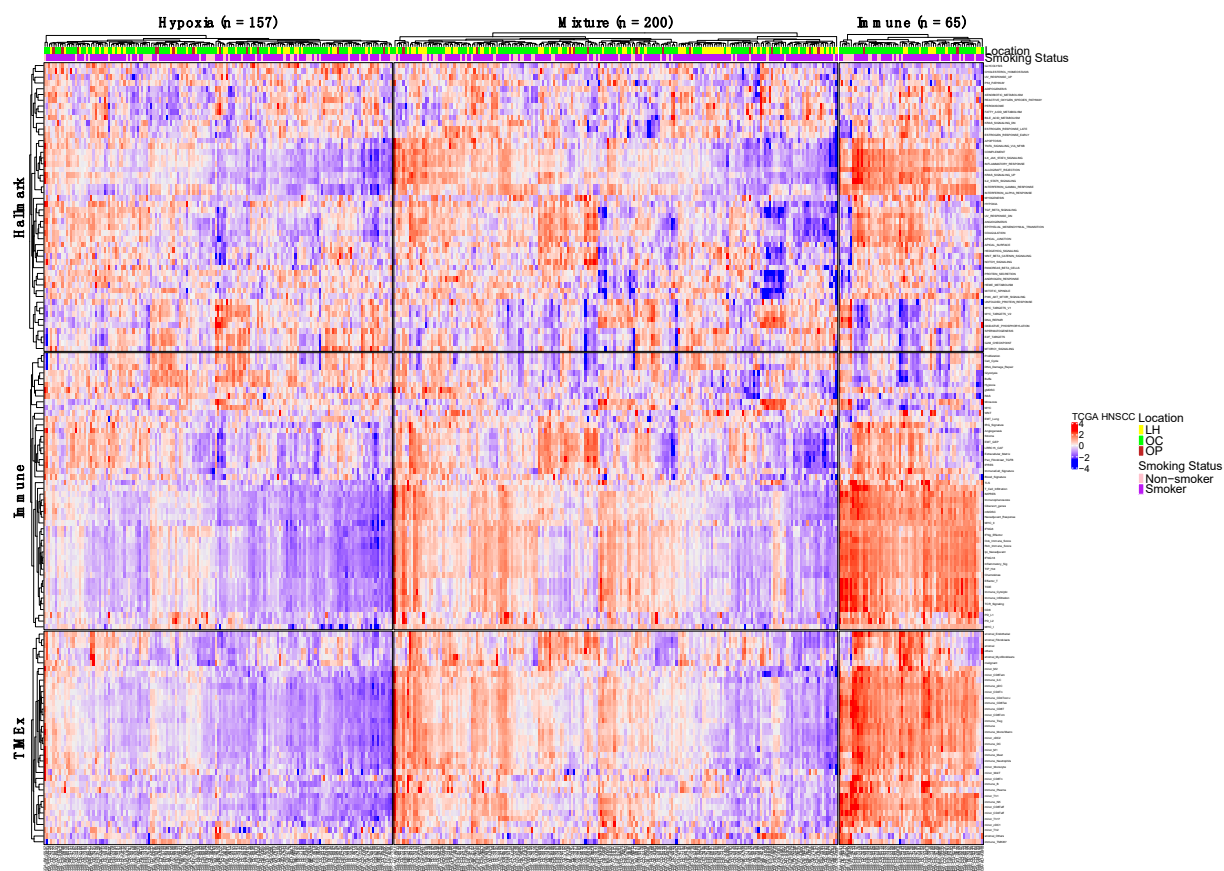

Supplementary Figure S1. Heatmap showing ssGSEA enrichment in three collections of gene sets. Each cell of the heatmap represents the enrichment score (blue: -4, red: 4) for each sample (x-axis) in the corresponding pathway (y-axis). The top two rows are smoking status and location (LH = Larynx/Hypopharynx, OC = Oral Cavity, OP = Oropharynx) information.

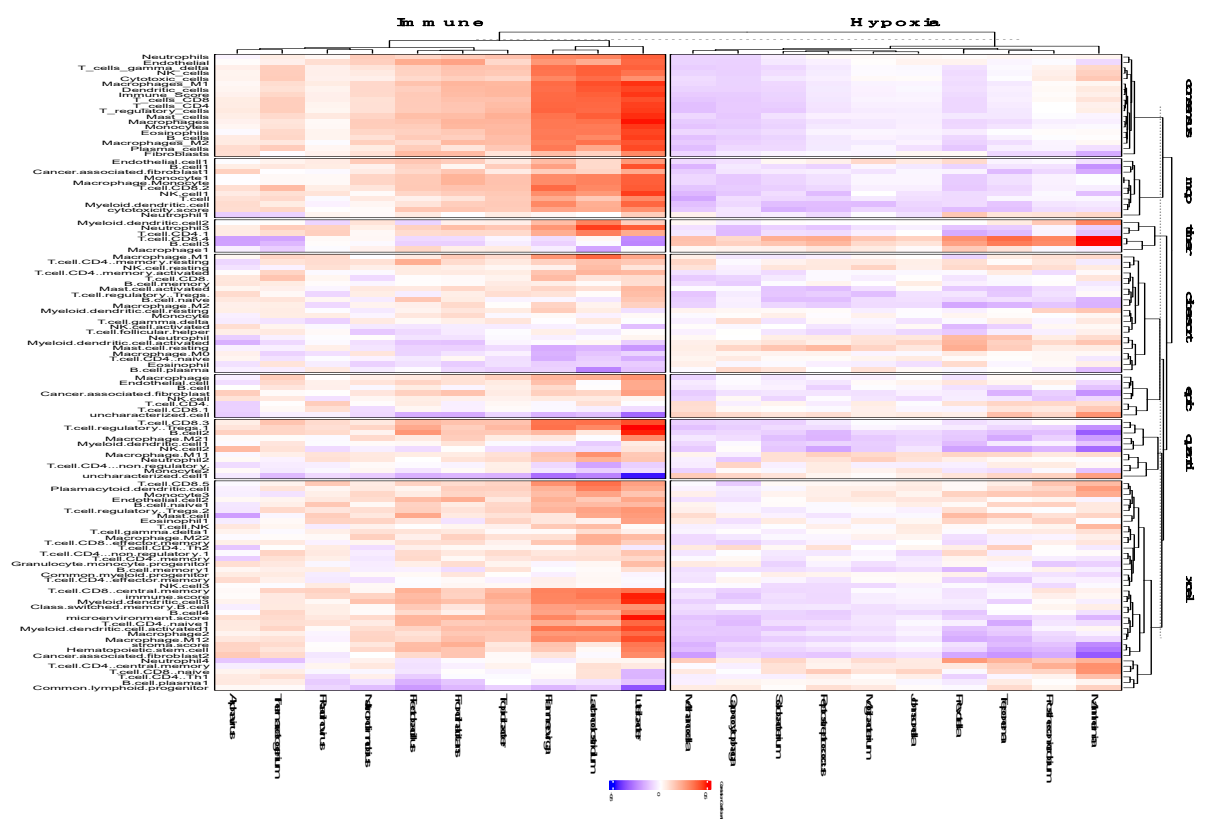

Supplementary Figure S2. Correlation between microbial signature and cell type composition. Heatmap showing cell type enrichment of the 20 microbes in the microbial signatures. Each cell of the heatmap is the Spearman Correlation Coefficient (blue = -0.5, red = 0.5) between the microbe (y-axis) in the corresponding cell type (x-axis).

Supplemental Table 1. TCGA Cohort

| Hypoxia/Immune Status |            |            |            |            |          |
|-----------------------|------------|------------|------------|------------|----------|
|                       | Hypoxia    | Mixture    | Immune     | Total      | p-value* |
| Not Available         | 5          | 8          | 4          | 17         |          |
| Age (median, range)   | 60 (19-87) | 62 (29-87) | 65 (24-90) | 61 (19-90) |          |
| Sex                   |            |            |            |            |          |
| Male                  | 112        | 138        | 36         | 286        | 0.09699  |
| Female                | 40         | 54         | 25         | 119        |          |
| Disease Site          |            |            |            |            |          |
| Oral Cavity           | 102        | 118        | 49         | 269        | 0.05892  |
| Larynx/Hypopharynx    | 38         | 63         | 10         | 111        |          |
| Oropharynx            | 12         | 11         | 2          | 25         |          |
| Disease Stage         |            |            |            |            |          |
| I                     | 9          | 9          | 5          | 23         | 0.1173   |
| II                    | 14         | 30         | 14         | 58         |          |
| III                   | 31         | 28         | 8          | 67         |          |
| IV                    | 88         | 101        | 29         | 218        |          |
| Not Available         | 10         | 24         | 5          | 39         |          |
| Smoking History       |            |            |            |            |          |
| Never smoker          | 36         | 36         | 16         | 88         | 0.3393   |
| Ever smoker           | 116        | 156        | 45         | 317        |          |
| Total                 | 157        | 200        | 65         | 422        |          |

\*Fisher's Exact test

Supplementary Table 1. Characteristics of the patients whose samples are included in the study. A breakdown of number of samples in each molecular types (Hypoxia, Mixture, and Immune) based on different characteristics. Fisher's Exact test is performed between molecular types and characteristics to show associations.
